# Supplementary material for: FgGmtB Plays an Important Role in Growth, Reproduction, Virulence and Deoxynivalenol Biosynthesis of Fusarium graminearum
Source: MDPI journal article supplement (doi:10.3390/jof10030208), 2024-03-11
Supplement: s1 [file s1]

Supplementary Table S1. PCR Primers used in this study

| Primer names  | Sequence (5'-3')                                  |
|---------------|---------------------------------------------------|
| FgGmtA-1F     | CATCATTCACGCTACACTGCC                             |
| FgGmtA-2R     | TTGACCTCCACTAGCTCCAGCCAAGCCTCGGTTTAGCGGAAGAGAGAG  |
| FgGmtA-3F     | GAATAGAGTAGATGCCGACCGCGGGTTCATTTGGTAGAGCCTGGTCC   |
| FgGmtA-4R     | ACGAAAGCGAAGCCTATCC                               |
| FgGmtA-5F     | CGGCTCAAGTCAACTCCAC                               |
| FgGmtA-6R     | CTTGTTGCGTGTATCGTCAG                              |
| FgGmtA-7F     | CATGAGAACTGTCTTGGCGC                              |
| FgGmtA-8R     | ACTCGATGGGTCGTTGACTG                              |
| FgGmtB-1F     | TTGGTCCTCCCAGTAGTAATCG                            |
| FgGmtB-2R     | TTGACCTCCACTAGCTCCAGCCAAGCCTTGTAAGAGAGTGGACGAACGG |
| FgGmtB-3F     | GAATAGAGTAGATGCCGACCGCGGGTTGCCAATCTTTCCTCCTAGCC   |
| FgGmtB-4R     | GCTGGCGTCAAGGATGTG                                |
| FgGmtB-5F     | GCATGATCAAGTCCCTTGC                               |
| FgGmtB-6R     | GACGAAACCAATAAAGATAGCTG                           |
| FgGmtB-7F     | CCACATGAAAGCAATATCAGG                             |
| FgGmtB-8R     | GTTAAGTGAACCCATGCGAC                              |
| HYG/F         | GGCTTGGCTGGAGCTAGTGGAGGTCAA                       |
| HY/R          | GTATTGACCGATTCTTGCGGTCCGAA                        |
| YG/F          | GATGTAGGAGGGCGTGGATATGTCCT                        |
| HYG/R         | AACCCGCGGTGCGCATCTACTCTATTC                       |
| H852          | TTCCTCCCTTTATTTTCAGATTCAA                         |
| H850          | ATGTTGGCGACCTCGTATTGG                             |
| H855R         | GCTGATCTGACCAGTTGC                                |
| H855F         | GTCGATGCGACGCAATCGT                               |
| FgGmtA-NEO/1F | CATCATTCACGCTACACTGCC                             |
| FgGmtA-NEO/2R | GTAAGCGTTAATCTAGAGCGTCGGTTTAGCGGAAGAGAGAG         |
| FgGmtA-NEO/3F | TGGGTAAACGACTCATAGGAGCATTTGGTAGAGCCTGGTCC         |
| FgGmtA-NEO/4R | ACGAAAGCGAAGCCTATCC                               |
| NEO-1F        | CGCTCTAGATTAACGCTTAC                              |
| NEO-2R        | CCTGATGTTCTTCGTCCA                                |
| NEO-3F        | GACAATCGGCTGCTCTGA                                |
| NEO-4R        | CTCCTATGAGTCGTTTACCCA                             |
| N852-F        | TCGGCTATGACTGGGCACAACA                            |

|                |                                                |
|----------------|------------------------------------------------|
| N852-R         | GAGCGGCGATACCGTAAAGCAC                         |
| N855-F         | GAATGGTCAAATCAAACCTGCTAGATAT                   |
| N856-R         | TTGACTGGCACTGCTGGG                             |
| T6-QF          | CCCTCAGTCAGCTCAAGACC                           |
| T6-QR          | CACCCTGCTAAAGACCCTCA                           |
| T10-QF         | GCTCCCAAATCTTGAAGCTG                           |
| T10-QR         | AGCGTCTTCCAAGACCTGAA                           |
| T12-QF         | CATCAGCCTCTGCTCTTCCCA                          |
| T12-QR         | GTCGCCCAAATCTATCCGTAA                          |
| T101-QF        | GCCTTCGTTCAGAACTCGAC                           |
| T101-QR        | CCCAAAGTCGTAATCCCAGA                           |
| CHS7-QF        | TCGTTATCTCACCACCCTGA                           |
| CHS7-QR        | AAACACAACGAAGCGCATAC                           |
| AbaA-QF        | ACTCAGGAAGCTTTGACCACGGC                        |
| AbaA-QR        | GGGCTCTGGTAGGGGTTGACAGTA                       |
| WetA-QF        | GTTCCAGGTACTCCCCTGCCAT                         |
| WetA-QR        | ACGTTCTCGTCGCGCTTTGGT                          |
| Mat1-QF        | TTCGGTCCTGATTACGATGCC                          |
| Mat1-QR        | CCAAGCGCTGGTGATCTCCATG                         |
| Mat2-QF        | AATCACCCAGGCACTCGACGT                          |
| Mat2-QR        | GCGTGAACGGCTGTGGACAT                           |
| mat3-QF        | ATCAATCTACTCCAGCGACG                           |
| Mat3-QR        | ACGCCAGTAAGCCTGTGTCTC                          |
| Mat4-QF        | AACGCTTACATCCTCTACCG                           |
| Mat4-QR        | CCTGAGCGCTAGACACGTGAGG                         |
| pYES2-FgGmtB-F | GATGCGGCCCTCTAGAATGGCCGACCAGAACAAGAAG          |
| pYES2-FgGmtA-R | TACCGAGCTCGGATCCCTTTGACGAATCTCGGTTCTCG         |
| pYES2-FgGmtA-F | GATGCGGCCCTCTAGAATGACCGATAAGAAGAACGAGG         |
| pYES2-FgGmtA-R | TACCGAGCTCGGATCCAGAGTTGGCATCACGGTTGC           |
| FgGmtA-CF      | AGGGAACAAAAGCTGGGTACCGGCGTACTTACGATGTCCAGATC   |
| FgGmtA-CR      | GAACAGCTCCTCGCCCTTGCTCACAGAGTTGGCATCACGGTTGC   |
| FgGmtB-CR      | AGGGAACAAAAGCTGGGTACCGTTGCCAAAGTTGTCCATGAGC    |
| FgGmtB-CR      | GAACAGCTCCTCGCCCTTGCTCACCTTTGACGAATCTCGGTTCTCG |

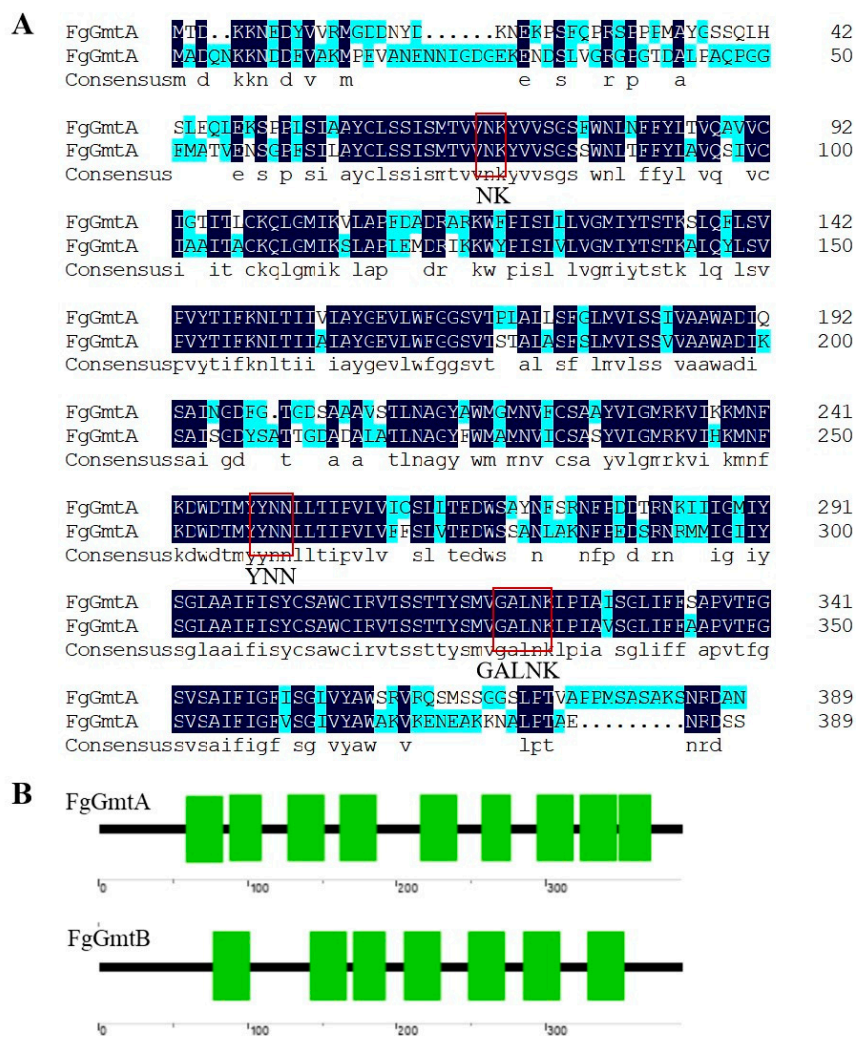

**Supplementary Figure S1.** Structural analysis of FgGmts of *F. graminearum*. (A) Multiple sequence alignments of *FgGmtA*, and *FgGmtB* were built with DNAMAN 6.0 software (Lynnon Biosoft, Foster City, CA, USA), and three conserved motifs (NK, YNN and GX(L/V)NK) are marked in a box. (B) Transmembrane structure of *FgGmts*.

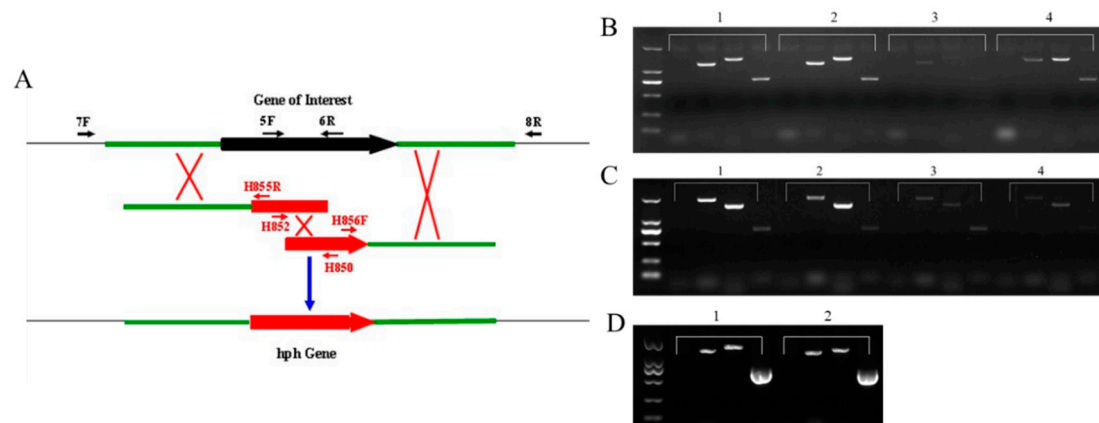

**Supplementary Figure S2.** Knockout strategy and validation of *FgGmtA* and *FgGmtB*. (A) Schematic of homologous recombination-based gene knockout and four-pair primer PCR detection of transformants. (B) Detection of *FgGmtA* knockout transformants. (C) Detection of *FgGmtB* gene knockout transformants. (D) Detection of *FgGmtA&B* gene knockout transformants.

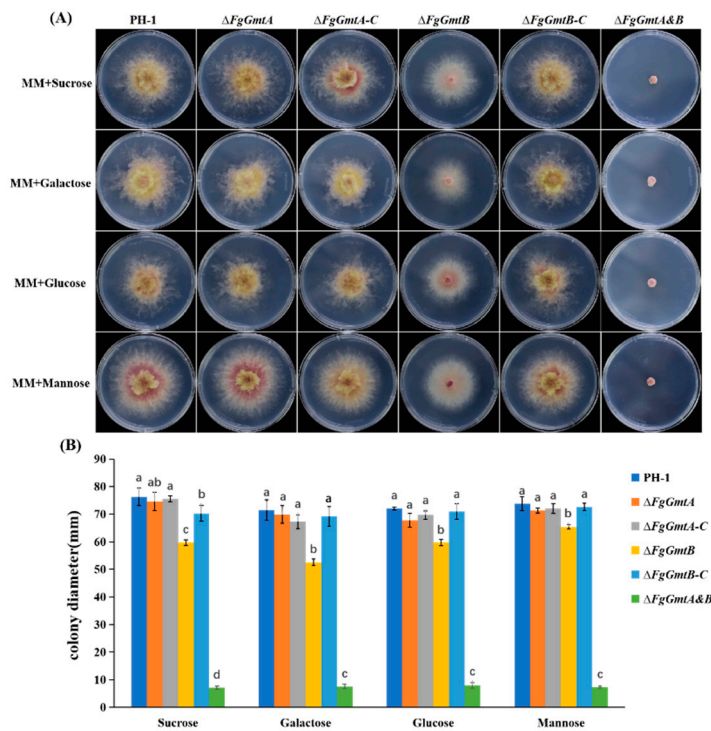

**Supplementary Figure S3.** Determination of the utilization of four carbon sources by *FgGmtA/B* in MM medium. (A) The growth of wild-type PH-1,  $\Delta FgGmtA$ ,  $\Delta FgGmtB$  and  $\Delta FgGmtA\&B$  strain complemented strain on MM medium containing different carbon sources. (B) the colony diameter of the strain after 3 days of growth on the MM plate. Values on bars followed by different letters statistically different at  $p < 0.05$ .

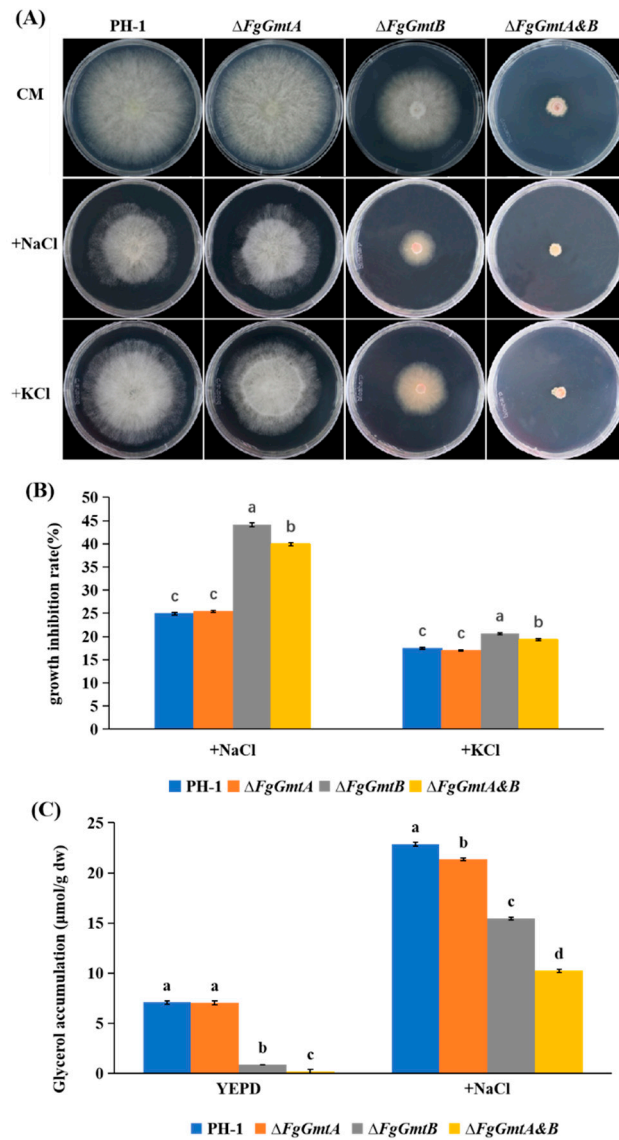

**Supplementary Figure S4.** Determination of *FgGmtA/B* sensitivity to osmotic stress and corresponding glycerol concentration. (A) Colonies of wild-type PH-1,  $\Delta FgGmtA$ ,  $\Delta FgGmtB$ ,  $\Delta FgGmtA\&B$ , PH-1 mutant strains on PDA media supplemented with or without 1.2 mol/L NaCl and 1.2 mol/L KCl. (B) Growth inhibition rate of each strain after incubation at 25 °C for 3 days, calculated from 3 independent experiments. (C) Intracellular glycerol accumulation in cells treated for 2 hours with or without 1.2 mol/L NaCl. Values on bars followed by different letters statistically different at  $p < 0.05$ .
